# Supplementary figures and images for: Assessing the transferability of common top-down and bottom-up coarse-grained molecular models for molecular mixtures
Source: Royal Society of Chemistry journal article supplement (doi:10.1039/c8cp05889j), 2018-12-27

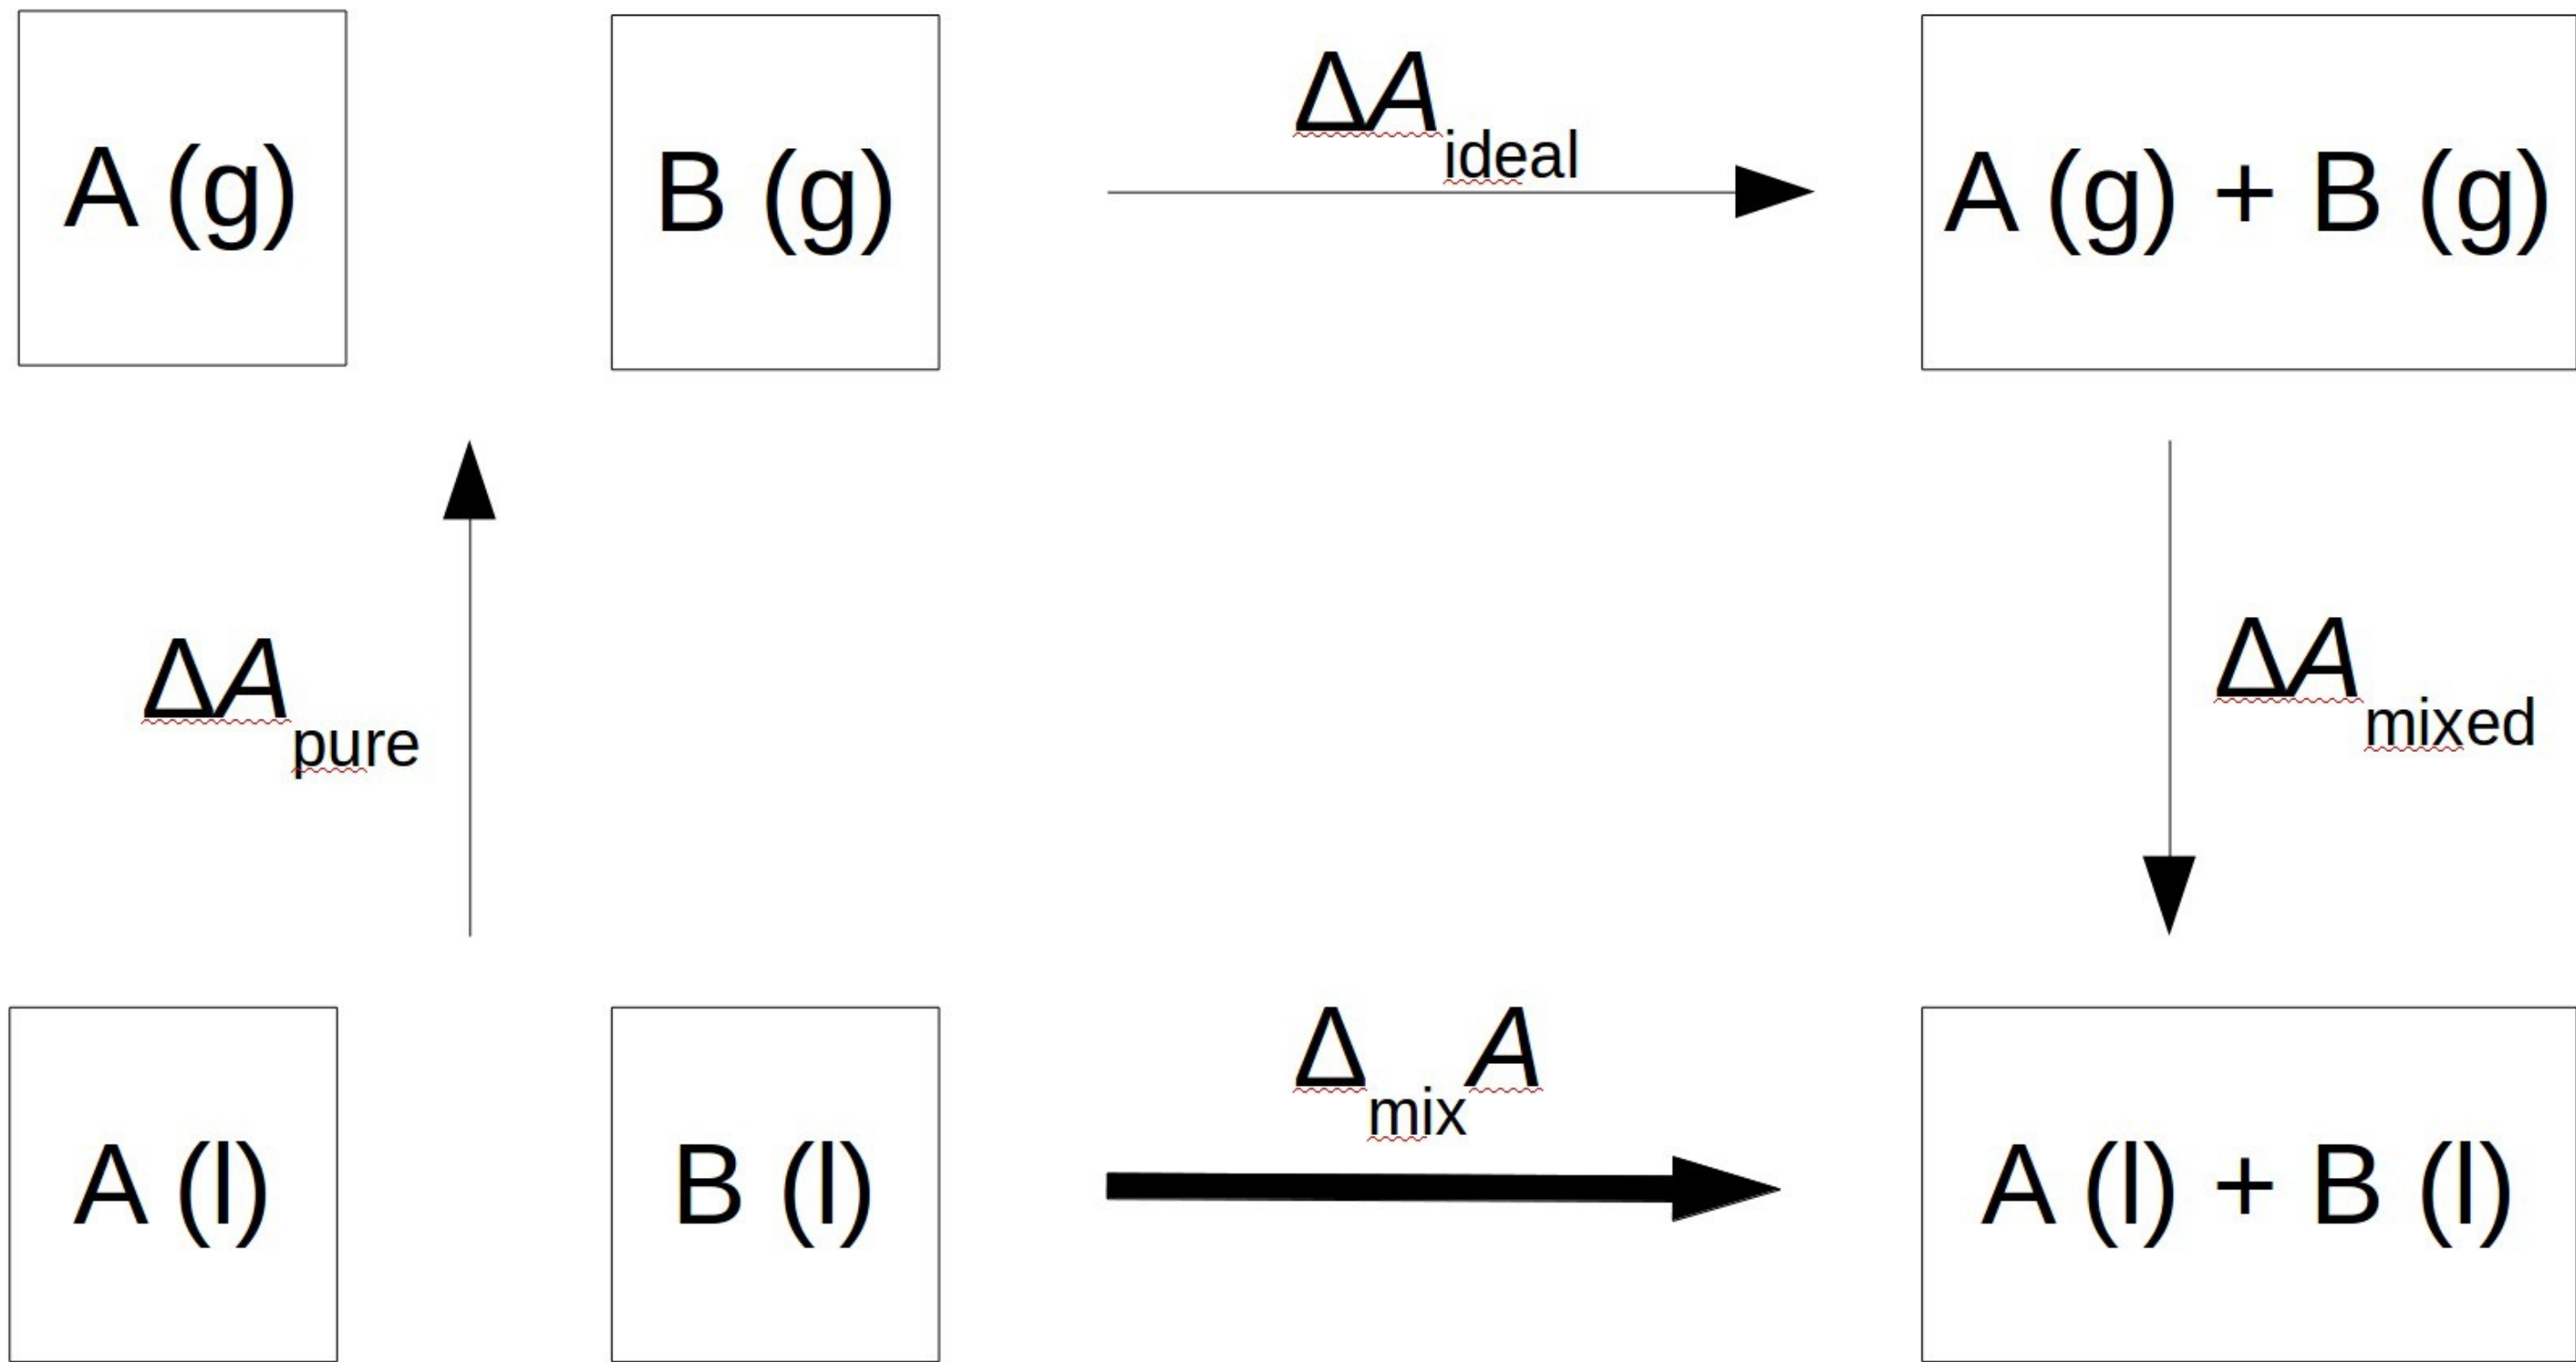

Supplement: c8cp05889j1.pdf [file c8cp05889j1.pdf]

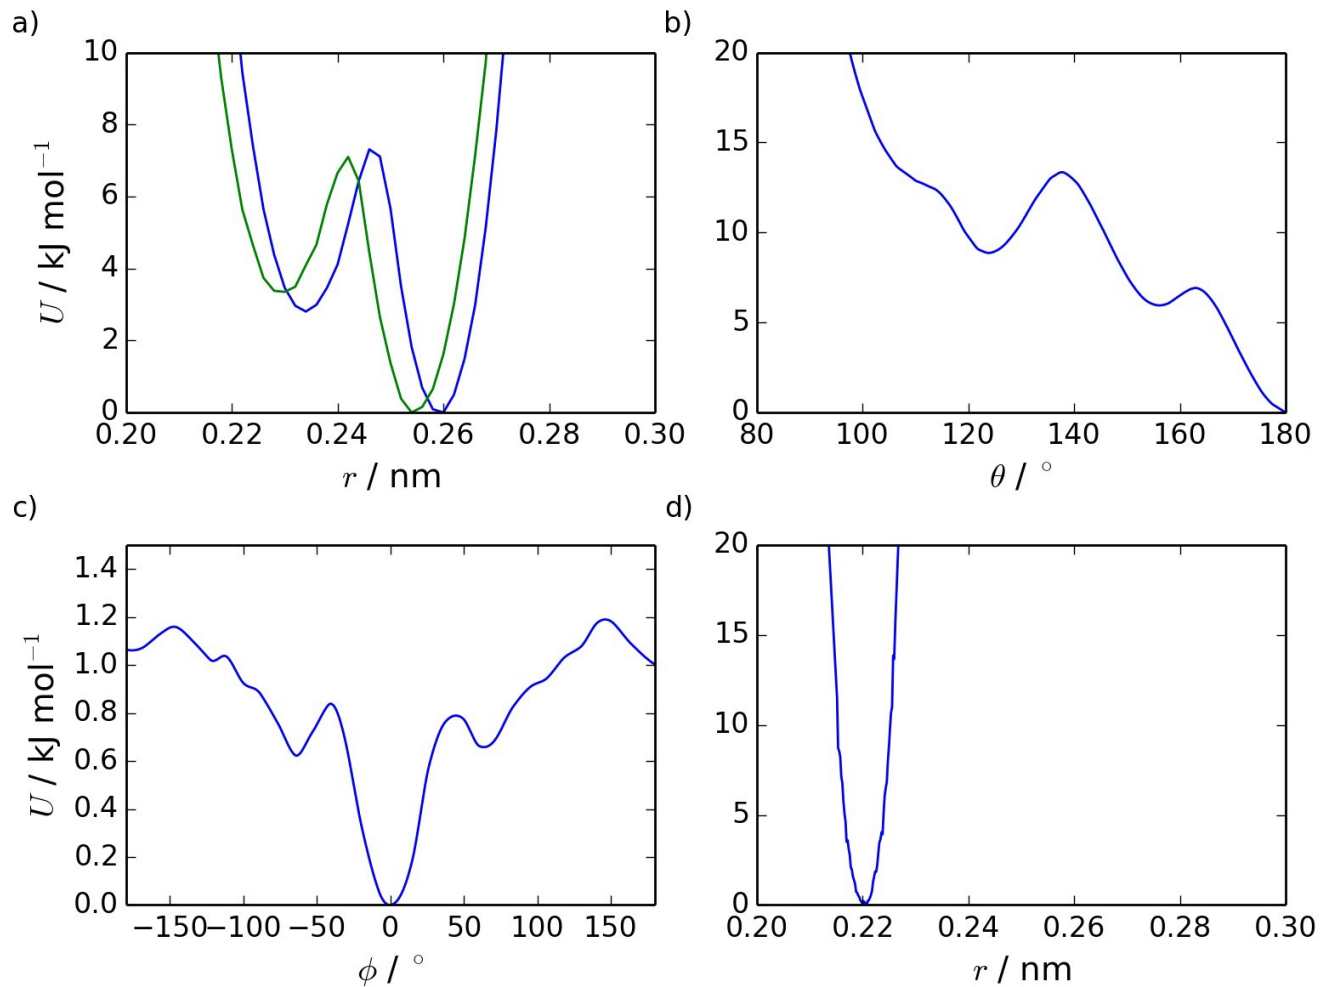

Supplement: c8cp05889j6.pdf [file c8cp05889j6.pdf]

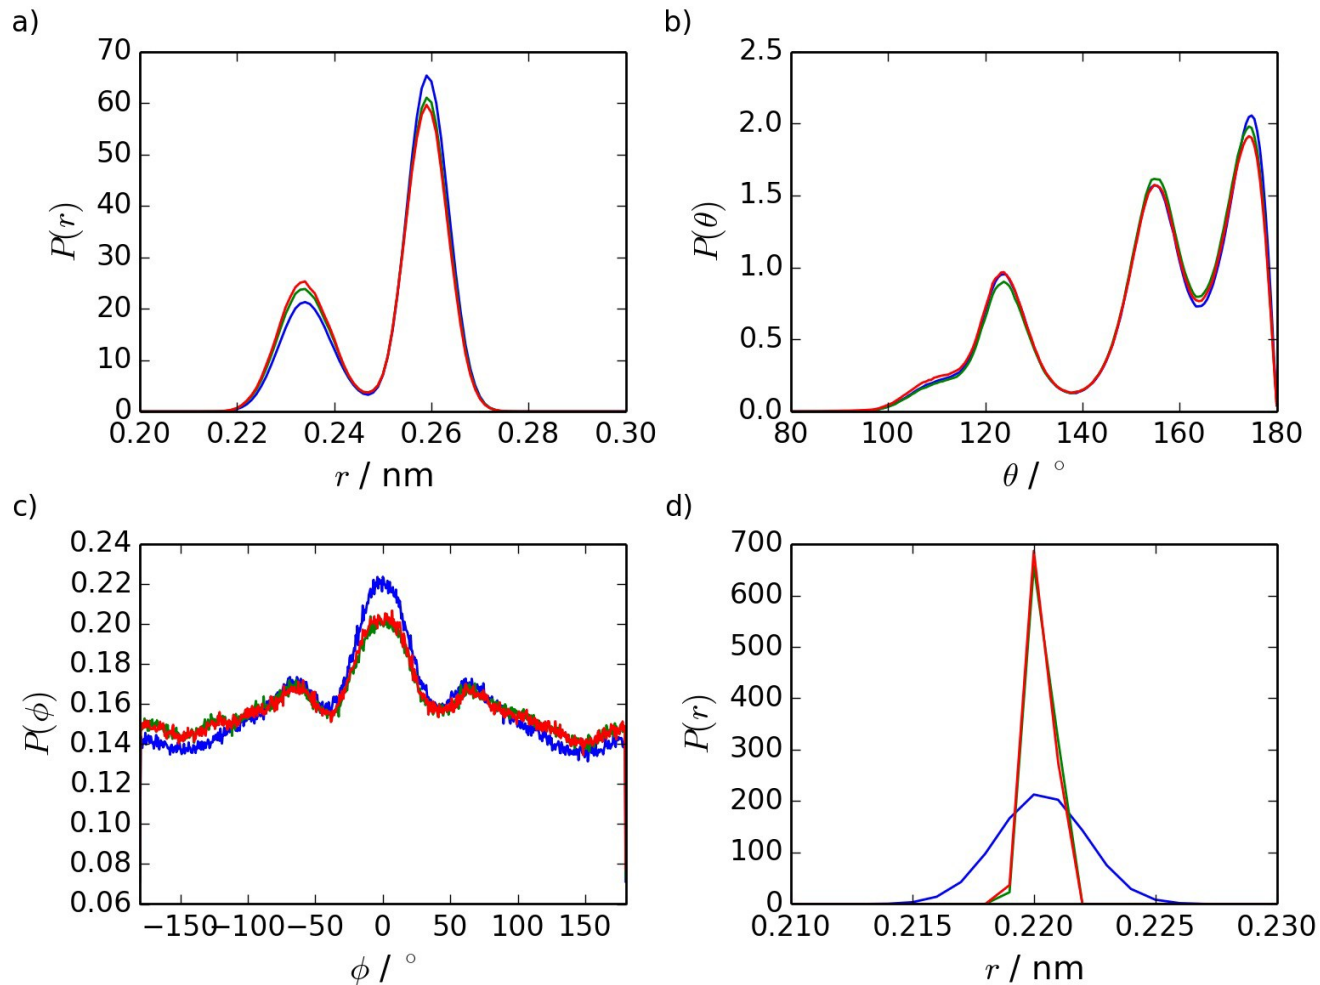

Supplement: c8cp05889j7.pdf [file c8cp05889j7.pdf]
